# Supplementary material for: Spatial effects of trade, foreign direct investment (FDI), and natural resource rents on carbon productivity in the GCC region
Source: PeerJ. 2023 Oct 12;11:e16281. doi: 10.7717/peerj.16281 (PMC10576965; doi:10.7717/peerj.16281)
Supplement: Supplemental Information 1 [file peerj-11-16281-s001.xlsx]

## Sheet: data
		FDI	OR	TO	UP	NGR	GDP	CO2		xsmle cp nnr to fdi to up, wmat(w) model (sdm) fe type(both) nsim(500) effects hausman
Bahrain	1980	-13.6049	70.0376	239.349	86.101	1.98943	1158100000	7.8813
Bahrain	1981	0.119672	59.4007	251.139	86.317	0.8261	1303900000	8.5188
Bahrain	1982	0.780566	33.5687	225.759	86.531	0.232411	1370800000	9.8305
Bahrain	1983	1.71604	29.7522	189.633	86.742	1.74543	1404400000	8.222
Bahrain	1984	3.60232	32.6636	190.33	86.95	1.57453	1468500000	9.2003
Bahrain	1985	2.77474	30.829	191.61	87.155	2.17629	1373100000	10.1859
Bahrain	1986	-1.04557	23.8654	183.524	87.357	2.64754	1147700000	11.003
Bahrain	1987	-1.05849	30.6976	189.768	87.557	1.6362	1275399900	11.4207
Bahrain	1988	5.99813	23.3777	172.832	87.754	1.45676	1392100000	12.1426
Bahrain	1989	4.68094	31.4618	186.274	87.949	1.4692	1452700000	11.7167
Bahrain	1990	2.16927	38.2145	210.161	88.14	1.77735	1590400000	12.4058
Bahrain	1991	13.4182	21.2817	180.642	88.329	1.40478	1735700000	11.8566
Bahrain	1992	18.2826	21.5425	181.124	88.398	1.33161	1786400000	10.8736
Bahrain	1993	-5.28819	18.5701	164.604	88.395	1.67321	1955300000	14.6086
Bahrain	1994	3.74033	15.2772	155.178	88.392	1.2346	2.0934e+09	14.7545
Bahrain	1995	7.36113	15.86	152.464	88.388	1.39786	2199399900	14.7865
Bahrain	1996	33.566	19.0857	164.115	88.385	1.80925	2294299900	15.59
Bahrain	1997	5.18623	16.927	148.582	88.382	2.19856	2387300100	17.2889
Bahrain	1998	2.90202	10.9559	128.489	88.379	1.84832	2325100000	18.3664
Bahrain	1999	6.853	15.0677	141.832	88.376	1.59207	2489499900	17.9887
Bahrain	2000	4.01155	18.9957	135.809	88.372	2.21667	3407650000	18.7941
Bahrain	2001	0.895244	15.3147	127.026	88.369	2.80817	3375050000	14.0778
Bahrain	2002	2.26181	14.78	131.134	88.373	2.20522	3607160000	15.868
Bahrain	2003	4.66554	15.2934	128.092	88.383	2.0189	4164130000	16.7695
Bahrain	2004	6.58021	16.9404	140.737	88.399	1.7804	4944460000	17.8835
Bahrain	2005	6.56659	20.5131	148.314	88.422	2.52654	6004240000	19.8041
Bahrain	2006	15.7509	20.7413	147.104	88.452	2.99724	6957790000	19.4211
Bahrain	2007	8.08243	19.0595	137.785	88.488	3.00567	8170480000	26.7711
Bahrain	2008	6.97758	21.5459	145.883	88.53	3.20544	9667300000	29.6813
Bahrain	2009	1.12105	14.0514	117.964	88.579	3.42416	8624770000	28.0981
Bahrain	2010	0.6058	17.1421	120.472	88.634	2.60262	9668190000	29.0754
Bahrain	2011	2.71349	23.2261	174.155	88.695	3.85273	10820000000	28.4676
Bahrain	2012	5.02347	19.8733	185.885	88.762	4.06388	11561740000	27.119
Bahrain	2013	11.456	20.5889	191.873	88.835	4.24978	12234840000	31.1577
Bahrain	2014	4.54843	18.5519	175.568	88.915	4.01248	12553780000	30.8997
Bahrain	2015	0.208993	9.60099	154.931	88.999	2.64761	11675040000	32.4596
Bahrain	2016	0.754929	7.39733	139.621	89.09	1.36729	12120350000	31.5595
Bahrain	2017	1.46272	8.72501	143.087	89.186	1.43111	13338140000	32.8352
Bahrain	2018	0.294085	11.0841	150.806	89.287	1.95244	14213554000	32.7871
Bahrain	2019	3.88409	9.74068	141.701	89.394	1.57303	14533647600	37.8137
Bahrain	2020	2.94118	7.35913	139.808	89.506	1.32307	13055982400	37.6027
Bahrain	2021	4.5434	7.35913	139.808	89.622	1.32307	14614617300	39.0161
Kuwiat	1980	0.00289819	68.6048	112.647	94.781	0.337522	7741000200	24.6162
Kuwiat	1981	0.00482905	47.1039	107.976	95.67	0.224332	6985800200	25.1396
Kuwiat	1982	-0.000417092	31.8192	106.869	96.414	0.0382845	6212299800	21.0903
Kuwiat	1983	0.000191668	43.5424	108.482	97.034	0.319068	6083440100	21.5412
Kuwiat	1984	-0.0277915	44.6753	104.754	97.551	0.304692	6424569900	28.2852
Kuwiat	1985	0.0338112	38.5722	96.4195	97.903	0.313276	6449940000	29.0702
Kuwiat	1986	-0.0811565	32.0996	94.1991	97.917	0.454639	5202809900	35.2303
Kuwiat	1987	-0.0282575	39.6899	89.6631	97.932	0.214598	6233330200	31.3779
Kuwiat	1988	0.0788693	33.4286	90.5044	97.946	0.303654	5773199900	32.8251
Kuwiat	1989	0.0150542	47.6974	93.7714	97.96	0.311937	7142900200	35.7716
Kuwiat	1990	0.0303889	55.324	103.011	97.974	0.267233	5307200000	37.807
Kuwiat	1991	0.00726692	9.09947	142.613	97.988	0.0483007	3129799900	14.9164
Kuwiat	1992	0.177757	29.4617	94.6881	98.002	0.11715	5826500100	29.6484
Kuwiat	1993	0.0553522	40.3914	92.057	98.016	0.258109	7230300200	49.1294
Kuwiat	1994	6.11378	38.771	93.1843	98.029	0.211374	7379999700	55.2258
Kuwiat	1995	0.0246451	38.9698	94.3196	98.096	0.351267	8113900000	54.5896
Kuwiat	1996	1.10294	42.097	91.4721	98.325	0.398678	9429100000	49.9136
Kuwiat	1997	0.0651594	38.3613	92.4435	98.527	0.485455	9206700000	54.6707
Kuwiat	1998	0.227694	29.105	94.9598	98.705	0.452931	7906500000	51.5603
Kuwiat	1999	0.239909	34.7299	85.3681	98.862	0.318217	9169700000	53.8227
Kuwiat	2000	0.0432209	51.2624	86.6183	99	0.529507	11570300000	53.3854
Kuwiat	2001	-0.319645	43.5034	86.8505	99.908	0.682505	10700000000	57.4854
Kuwiat	2002	0.0094905	38.4216	81.2252	100	0.463667	11590000000	57.981
Kuwiat	2003	-0.140176	40.3811	86.5552	100	0.440254	14267200000	59.6241
Kuwiat	2004	0.0399619	47.9048	89.2976	100	0.439999	17516700000	63.1089
Kuwiat	2005	0.28949	55.4127	92.2427	100	0.573478	23593200000	71.1658
Kuwiat	2006	0.119455	52.4765	89.7131	100	0.595605	29469500000	73.3897
Kuwiat	2007	0.0972924	48.5533	91.7325	100	0.5425	32580600000	74.8753
Kuwiat	2008	-0.00403796	53.7758	92.6835	100	0.562858	39619800000	82.2973
Kuwiat	2009	1.05092	39.539	88.8111	100	0.666542	30496200000	86.955
Kuwiat	2010	1.13034	48.8849	97.0277	100	0.52189	33079200000	89.2723
Kuwiat	2011	2.11534	58.1862	99.0904	100	0.733171	42522800000	86.2627
Kuwiat	2012	1.65025	53.9457	101.011	100	0.811017	48722300000	101.766
Kuwiat	2013	0.823163	53.0451	97.6067	100	0.882306	49392100000	83.7233
Kuwiat	2014	0.298716	50.9575	100.037	100	0.798444	46284900000	75.6235
Kuwiat	2015	0.248455	37.0754	98.6996	100	0.787375	34473300000	92.4478
Kuwiat	2016	0.266887	32.5206	96.1589	100	0.459936	33055700000	101.897
Kuwiat	2017	0.0936248	36.9683	97.84	100	0.471194	36610565200	95.9378
Kuwiat	2018	-0.0154705	45.1217	103.115	100	0.615274	4.17311e+10	97.0454
Kuwiat	2019	0.378583	40.541	98.1829	100	0.492658	4.13493e+10	104.361
Kuwiat	2020	-0.526665	31.613	98.1829	100	0.394811	3.2445e+10	99.7788
Kuwiat	2021	-0.526665	31.613	98.1829	100	0.394811	3.46982e+10	106.134
Oman	1980	1.64561	56.5234	100.315	47.562	0.269953	2066100000	6.0419
Oman	1981	0.861484	47.6854	102.776	49.471	0.132521	2507300100	6.0126
Oman	1982	2.41052	37.3262	101.698	51.385	0.0260957	2609400100	5.7305
Oman	1983	1.94898	42.0951	91.7187	53.294	0.22662	2739899900	7.5259
Oman	1984	1.792	39.8062	87.8598	55.197	0.234472	3046900000	8.0535
Oman	1985	1.61176	40.5808	87.0106	57.079	0.278642	3455899900	8.6185
Oman	1986	1.91595	31.1885	80.173	58.944	0.395253	2797700100	9.8249
Oman	1987	0.446161	42.1607	77.945	60.783	0.293453	3003399900	9.4018
Oman	1988	1.09474	34.5621	71.3599	62.594	0.251636	3224500000	10.5166
Oman	1989	1.1988	45.173	71.3599	64.366	0.236412	3603600000	9.9857
Oman	1990	1.21748	51.6063	74.8292	66.102	0.259149	4492900000	11.2224
Oman	1991	1.19244	33.2848	77.8068	67.796	0.244941	4360800000	11.5948
Oman	1992	0.837528	33.206	80.2648	69.447	0.203605	4787900000	11.8927
Oman	1993	1.13665	32.803	81.1058	71.044	0.250071	4803600000	13.2248
Oman	1994	0.591871	30.1587	77.7887	71.688	0.195393	4967300000	15.0541
Oman	1995	0.3354	32.3889	79.5915	71.669	0.299759	5307100000	15.7191
Oman	1996	0.396655	37.7553	85.5762	71.649	0.383916	5874300000	14.8838
Oman	1997	0.407262	33.2964	88.628	71.629	0.496109	6089500000	15.2479
Oman	1998	0.728732	23.4086	92.2618	71.609	0.453897	5381813700	16.3008
Oman	1999	0.257159	31.9844	87.6194	71.589	0.382723	5995683900	20.5566
Oman	2000	0.420352	45.5248	92.8973	71.569	1.15849	7500615500	21.5356
Oman	2001	0.0267405	37.3335	96.4905	71.549	2.09209	7479294200	20.1068
Oman	2002	0.542293	34.4642	95.7879	71.529	1.76587	7744889700	25.2349
Oman	2003	0.11541	34.2865	97.0004	71.509	1.88046	8318160800	32.0275
Oman	2004	0.448452	37.7393	101.547	71.827	1.90288	9521647600	27.5925
Oman	2005	4.94937	44.0989	99.111	72.4	2.65997	11951025800	29.4674
Oman	2006	4.28877	41.8458	98.555	72.967	3.36348	14309467300	39.0467
Oman	2007	7.91752	38.2495	108.872	73.527	3.41	16181828400	43.9696
Oman	2008	4.84667	37.9852	108.607	74.08	2.71771	23418146500	46.093
Oman	2009	3.07063	29.9473	105.006	74.624	3.19918	18605325800	43.4752
Oman	2010	1.91196	37.1248	96.3866	75.161	2.43124	24990000000	50.3154
Oman	2011	2.10219	46.1754	101.641	76.183	3.51022	29797800000	55.1025
Oman	2012	1.5612	42.7638	102.074	77.564	3.54408	3.36087e+10	62.7135
Oman	2013	1.79286	40.9903	112.543	78.882	3.8827	34580400000	65.2514
Oman	2014	1.38766	36.0779	102.278	80.145	3.3157	35642800000	65.8966
Oman	2015	-2.76002	21.3867	96.3756	81.35	2.53313	30264300000	67.3762
Oman	2016	3.0152	18.2614	82.8622	82.5	1.46801	28887000000	65.6694
Oman	2017	3.69547	21.7657	88.9528	83.56	1.60703	31089400000	68.6197
Oman	2018	7.05434	26.6783	89.2792	84.539	2.29446	35184000000	72.5558
Oman	2019	4.81225	24.8643	86.4761	85.443	1.79673	33859400000	72.1772
Oman	2020	3.80578	19.3662	91.8757	86.276	1.59693	29187163400	72.5062
Oman	2021	4.55768	19.3662	93.9161	87.044	1.59693	3.39098e+10	80.9912
Qatar	1980	0.138458	71.489	78.6499	89.363	1.56649	28630999000	13.0817
Qatar	1981	0.0436426	49.0751	78.6499	89.514	0.652558	31527000100	12.8407
Qatar	1982	0.048837	36.2278	78.6499	89.663	0.162963	27651999700	12.3349
Qatar	1983	0.0146886	38.9464	78.6499	89.811	1.45527	23541999600	11.2426
Qatar	1984	-0.222839	49.2968	78.6499	89.956	1.4558	24404000800	12.298
Qatar	1985	0.129524	39.6283	78.6499	90.1	1.54617	22397999100	12.3778
Qatar	1986	-0.0290915	24.6852	78.6499	90.4	1.77643	18392999900	13.267
Qatar	1987	-0.0545311	30.1356	78.6499	91.056	1.12681	19825000400	11.4705
Qatar	1988	-0.341659	26.5693	78.6499	91.671	0.971278	21979000800	11.8977
Qatar	1989	-0.0231199	38.1021	78.6499	92.247	0.967615	23616000000	14.2924
Qatar	1990	0.0663004	47.8598	78.6499	92.786	1.09598	26791999500	11.4112
Qatar	1991	0.617998	30.2545	78.6499	93.291	1.28426	25056000000	17.3805
Qatar	1992	0.517646	28.6087	78.6499	93.763	1.00554	27832000500	26.7803
Qatar	1993	1.00676	30.1272	78.6499	94.203	1.43746	26050000900	30.6845
Qatar	1994	1.78793	26.7634	78.6499	94.614	1.12274	26843000800	30.3043
Qatar	1995	1.14968	27.9538	87.668	94.998	1.23958	29621999600	31.2983
Qatar	1996	3.74056	36.2348	83.5092	95.356	1.52192	3.2976e+10	31.6684
Qatar	1997	3.70276	28.2345	84.447	95.659	1.98632	41123999700	36.7893
Qatar	1998	3.38648	24.5563	91.0581	95.888	2.0621	37330001900	31.7217
Qatar	1999	0.913813	29.5793	85.733	96.105	2.00221	45111000000	30.7556
Qatar	2000	1.41668	38.8454	89.6127	96.311	3.17735	64646000000	34.0117
Qatar	2001	1.68498	31.6077	94.9687	96.506	4.20379	63840000000	41.2135
Qatar	2002	3.22211	28.3293	88.4697	96.692	3.3697	70484000000	40.7026
Qatar	2003	2.65542	31.0218	90.1649	96.868	3.06394	85663000000	41.3005
Qatar	2004	3.77818	34.0446	90.3724	97.09	3.22658	115512000000	42.7114
Qatar	2005	5.61413	38.8616	94.7455	97.396	4.22124	162091000000	50.6901
Qatar	2006	5.74881	34.5257	98.5709	97.671	4.44142	221611000000	63.1968
Qatar	2007	5.89622	30.7851	96.1141	97.917	4.78596	290152000000	62.9006
Qatar	2008	3.27806	31.1727	89.4328	98.139	4.75133	419583000000	64.2566
Qatar	2009	8.30764	23.2538	80.1442	98.336	6.1177	355986000000	68.5968
Qatar	2010	3.73261	25.3492	86.0703	98.501	5.30313	455445195100	71.9202
Qatar	2011	0.559389	29.5579	98.7216	98.602	7.85994	610701977800	79.6477
Qatar	2012	0.211889	28.2909	105.746	98.697	8.32222	680073948600	93.8228
Qatar	2013	-0.422883	25.058	102.383	98.785	8.35851	723368620400	83.9896
Qatar	2014	0.504491	21.3288	99.0344	98.868	7.49714	750657538800	91.5488
Qatar	2015	0.662099	12.4882	93.7076	98.945	6.11578	588733438300	91.3274
Qatar	2016	0.510044	10.6076	89.5476	99.015	3.50473	552305142000	87.5447
Qatar	2017	0.612039	12.8667	91.4946	99.078	3.71567	586400804900	100.18
Qatar	2018	-1.1925	15.5544	91.8384	99.135	4.65512	667339231900	95.2319
Qatar	2019	-1.59957	13.677	90.3197	99.188	3.65523	640048685600	101.152
Qatar	2020	-1.68551	11.6557	90.0191	99.235	3.32585	5.25657e+11	92.8607
Qatar	2021	-0.608539	11.6557	93.0458	99.278	3.32585	6.54025e+11	95.6672
Saudi Arabia	1980	-1.94012	71.182	90.7562	65.86	0.139931	547380734660	169.24
Saudi Arabia	1981	3.526	55.9532	92.9118	67.281	0.0739464	623367313760	175.304
Saudi Arabia	1982	7.26211	35.3508	89.8501	68.673	0.0176556	525333911920	157.893
Saudi Arabia	1983	3.82739	33.6702	86.1453	70.033	0.150109	446287885000	160.837
Saudi Arabia	1984	4.05422	32.5669	79.7444	71.36	0.229129	421558214400	155.512
Saudi Arabia	1985	0.472986	26.3477	66.7135	72.647	0.289122	376318167760	172.421
Saudi Arabia	1986	1.11076	22.6806	62.4892	73.9	0.411648	322020334180	204.604
Saudi Arabia	1987	-1.36918	27.8744	67.9943	74.589	0.314019	320931301890	190.447
Saudi Arabia	1988	-0.371645	26.7247	66.5265	75.267	0.302889	330519326950	202.252
Saudi Arabia	1989	-0.685235	34.5422	71.8231	75.93	0.290483	357064601320	203.424
Saudi Arabia	1990	1.58236	47.133	71.708	76.583	0.333866	440525367900	208.497
Saudi Arabia	1991	0.121007	32.4129	74.6993	77.223	0.283349	495176140500	288.546
Saudi Arabia	1992	-0.0575786	33.6204	75.092	77.851	0.247913	513394098100	316.175
Saudi Arabia	1993	1.02822	32.1798	67.807	78.186	0.343238	497964790800	340.642
Saudi Arabia	1994	0.258431	28.6133	60.0713	78.429	0.27873	506229949900	328.139
Saudi Arabia	1995	-1.30782	29.6461	65.0418	78.67	0.309057	536819671100	262.421
Saudi Arabia	1996	-0.710607	33.2369	66.6539	78.91	0.377006	594190683300	258.275
Saudi Arabia	1997	1.83141	29.2234	65.1881	79.147	0.434184	621533522500	215.808
Saudi Arabia	1998	2.91838	20.6608	56.0884	79.383	0.394278	550408117800	207.24
Saudi Arabia	1999	-0.481665	26.6573	57.8461	79.616	0.314659	606438600000	225.986
Saudi Arabia	2000	-0.992569	41.1396	68.1665	79.848	0.545321	710680973300	296.364
Saudi Arabia	2001	0.0106659	33.1637	63.5606	80.077	0.731354	690515511500	296.588
Saudi Arabia	2002	-0.3239	31.0837	64.5928	80.304	0.605857	711022200900	325.698
Saudi Arabia	2003	-0.271773	36.77	69.8312	80.53	0.586081	809278707200	326.517
Saudi Arabia	2004	-0.12921	42.1154	75.0828	80.754	0.608458	970283486400	394.585
Saudi Arabia	2005	3.68305	51.543	81.9541	80.979	0.818211	1230771342300	395.855
Saudi Arabia	2006	4.85359	51.2529	89.9446	81.204	0.953898	1411491008300	431.292
Saudi Arabia	2007	5.84631	47.5069	94.8633	81.427	0.991187	1558827275000	386.507
Saudi Arabia	2008	7.59063	54.4483	96.1026	81.649	1.00782	1949237769900	432.336
Saudi Arabia	2009	8.49635	34.2978	84.8583	81.867	1.12457	1609117122300	465.844
Saudi Arabia	2010	5.53432	38.9575	82.5498	82.084	0.84925	1.98078e+12	517.716
Saudi Arabia	2011	2.42958	50.7764	85.5435	82.302	1.14716	2.51715e+12	497.659
Saudi Arabia	2012	1.65527	48.3847	83.5118	82.52	1.22752	2.75991e+12	566.826
Saudi Arabia	2013	1.18727	45.1807	82.709	82.74	1.26035	2.79993e+12	544.564
Saudi Arabia	2014	1.05927	40.4258	80.6405	82.96	1.17274	2.83631e+12	612.842
Saudi Arabia	2015	1.24429	23.571	71.1202	83.18	0.855248	2.45351e+12	678.849
Saudi Arabia	2016	1.15555	19.6203	61.862	83.401	0.498333	2.41851e+12	642.86
Saudi Arabia	2017	0.206052	23.676	64.185	83.622	0.556448	2.5822e+12	643.639
Saudi Arabia	2018	0.52011	29.2984	64.2321	83.844	0.717721	3.06217e+12	626.191
Saudi Arabia	2019	0.567755	24.6029	62.8161	84.065	0.523929	3.01356e+12	656.481
Saudi Arabia	2020	0.767615	17.6953	52.0766	84.287	0.44768	2.63763e+12	661.193
Saudi Arabia	2021	2.3137	17.6953	59.1165	84.508	0.44768	3.12578e+12	672.38
UAE	1980	0.223951	46.4955	89.8646	80.71	0.420317	161638000000	36.8234
UAE	1981	-0.0343378	31.3414	89.8646	80.683	0.221193	181103000000	36.7669
UAE	1982	0.203892	22.3678	89.8646	80.466	0.0470093	171152000000	36.7528
UAE	1983	0.106394	22.9177	89.8646	80.247	0.330796	157131000000	35.2205
UAE	1984	0.407195	22.9703	89.8646	80.026	0.407948	153477000000	46.1556
UAE	1985	-0.544188	23.7725	89.8646	79.804	0.53485	149056000000	49.6525
UAE	1986	0.324686	15.8693	89.8646	79.624	0.653721	124607000000	47.0301
UAE	1987	0.128405	23.7166	89.8646	79.482	0.478377	133569000000	47.4504
UAE	1988	0.520707	20.008	89.8646	79.339	0.451181	133168000000	48.0956
UAE	1989	0.0935488	29.1744	89.8646	79.196	0.468816	152218000000	54.1861
UAE	1990	-0.228435	36.2284	89.8646	79.051	0.478434	186125000000	51.7038
UAE	1991	0.050318	24.4021	89.8646	78.906	0.504099	189248000000	56.6734
UAE	1992	0.239163	23.0961	89.8646	78.76	0.372496	199112000000	57.7571
UAE	1993	0.721472	20.2647	89.8646	78.614	0.483617	204200000000	65.5656
UAE	1994	0.10532	17.5933	89.8646	78.467	0.393118	217709000000	72.6048
UAE	1995	0.608195	17.4906	89.8646	78.319	0.503341	241345000000	70.0123
UAE	1996	0.408475	19.9078	89.8646	78.493	0.636435	270080000000	72.7749
UAE	1997	0.294816	17.045	89.8646	78.938	0.751392	289418000000	73.1008
UAE	1998	0.340485	11.2204	89.8646	79.378	0.622363	277914000000	80.6825
UAE	1999	-1.16684	14.1617	89.8646	79.81	0.516138	310126000000	77.5438
UAE	2000	-0.485282	21.1765	89.8646	80.236	0.787847	383179000000	111.787
UAE	2001	1.14589	16.2659	89.8646	80.655	0.982994	379412000000	100.591
UAE	2002	0.0867814	14.6419	93.0717	81.067	0.8219	403300000000	83.6982
UAE	2003	3.42266	17.1396	102.3	81.472	0.781387	456662000000	105.619
UAE	2004	6.76715	20.0699	116.623	81.871	0.770201	542885000000	111.802
UAE	2005	6.03482	24.7974	119.553	82.262	1.02083	663317651100	114.478
UAE	2006	5.76544	25.0652	119.471	82.648	1.10419	815723000000	121.737
UAE	2007	5.50044	22.8583	136.798	83.023	1.10841	947197000000	133.264
UAE	2008	1.60487	27.3763	148.514	83.387	1.06643	1158580526300	153.97
UAE	2009	0.447367	17.975	153.462	83.742	1.2136	931152675000	165.5
UAE	2010	3.03559	21.6572	143.877	84.087	0.928359	1.06424e+12	180.622
UAE	2011	2.03957	28.7481	151.666	84.423	1.27607	1287821099400	192.991
UAE	2012	2.48736	28.4379	159.97	84.749	1.35169	1.41248e+12	201.372
UAE	2013	2.4399	25.7524	161.1	85.066	1.35236	1.4698e+12	205.758
UAE	2014	2.6736	23.0463	164.03	85.375	1.1963	1.5208e+12	201.713
UAE	2015	2.30934	13.1212	169.476	85.674	0.922663	1.35984e+12	216.377
UAE	2016	2.60112	10.8086	170.903	85.965	0.50884	1.35609e+12	212.344
UAE	2017	2.65142	13.0168	172.803	86.248	0.540899	1.43417e+12	214.156
UAE	2018	2.43187	16.5828	157.921	86.522	0.692937	1.56834e+12	210.218
UAE	2019	4.27634	16.3455	167.384	86.789	0.520151	1.53507e+12	208.496
UAE	2020	5.68984	11.5122	166.572	87.048	0.431644	1.28344e+12	199.084
UAE	2021	4.97977	11.5122	166.572	87.299	0.431644	1.52417e+12	204.087
